# Supplementary material
Source: MDPI journal article supplement (https://www.mdpi.com/2079-6412/8/12/449)
Supplement: s1 [file s1]

# Supplementary Materials

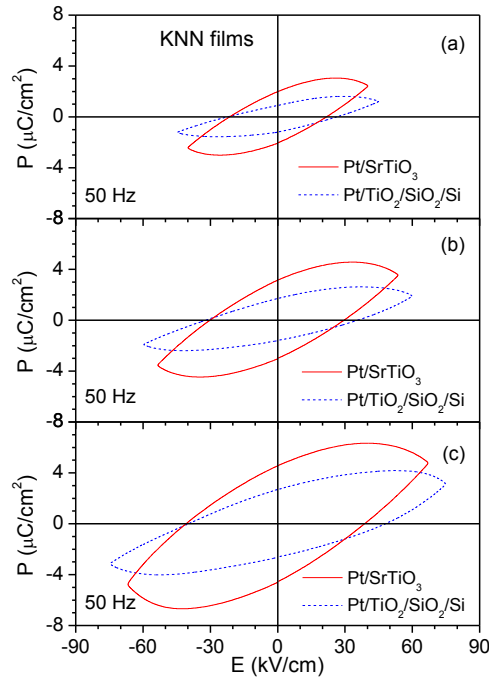

**Figure S1.** Polarization ( $P$ )-electric field ( $E$ ) loops of KNN films deposited on Pt/SrTiO<sub>3</sub> (solid line) and Pt/TiO<sub>2</sub>/SiO<sub>2</sub>/Si substrates (dash line) measured at room temperature and 50 Hz under electric field up to 45 (a), 60 (b) and 75 kV/cm (c).

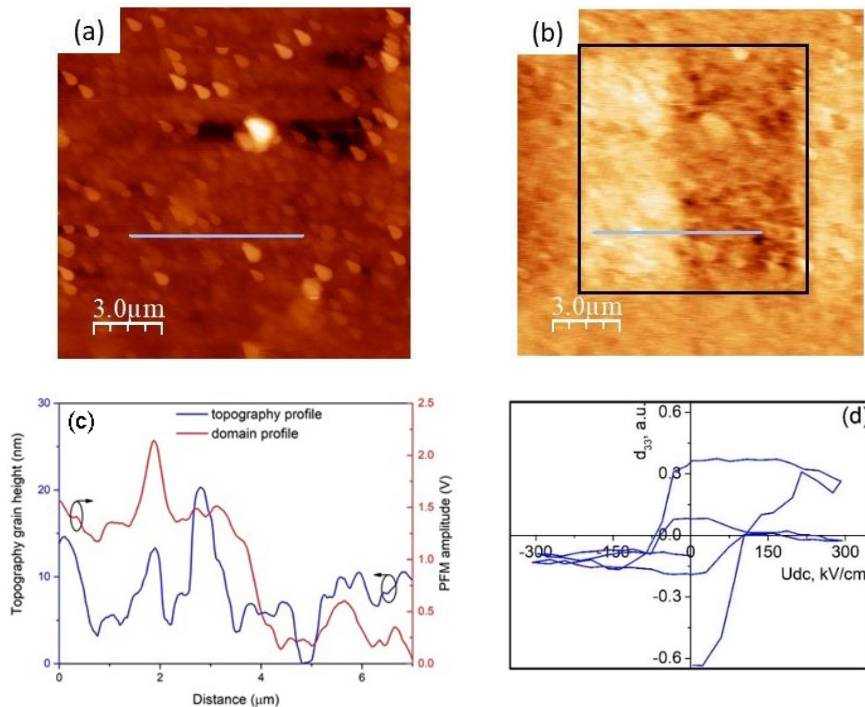

**Figure S2.** Topography (a), out-of-plane PFM signal (b), cross-section profile of topography and PFM amplitude (c) and local piezoelectric hysteresis loops (d) of KNN thin films deposited on Pt/SrTiO<sub>3</sub> substrates. No out-of-plane piezoresponse could be obtained for KNN films on Pt/TiO<sub>2</sub>/SiO<sub>2</sub>/Si substrates.

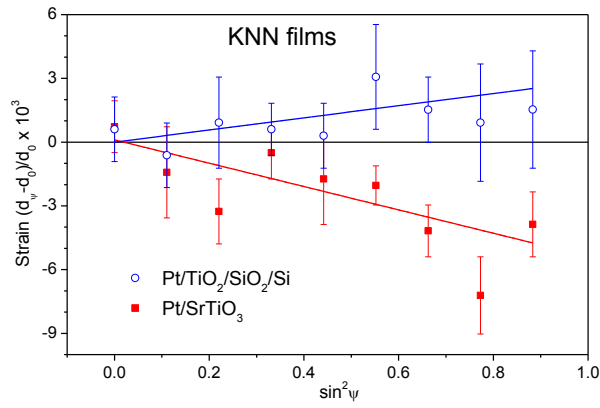

**Figure S3.** Strain  $(d_\psi - d_0)/d_0$  of KNN films on Pt/TiO<sub>2</sub>/SiO<sub>2</sub>/Si (open circles) and Pt/SrTiO<sub>3</sub> substrates (solid squares) as a function of  $\sin^2 \psi$  together with linear fits used for stress calculations at room temperature.

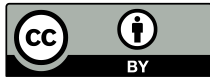

© 2018 by the authors. Submitted for possible open access publication under the terms and conditions of the Creative Commons Attribution (CC BY) license (<http://creativecommons.org/licenses/by/4.0/>).
